# Supplementary material
Source: PubMed Central journal article supplement (PMC7833938)
Supplement: mmc1.pdf [file mmc1.pdf]

# THE LANCET

## Rheumatology

### Supplementary appendix

This appendix formed part of the original submission. We post it as supplied by the authors.

Supplement to: Mehta P, Sanchez E, Moraitis E, et al. Influenza vaccination and interruption of methotrexate in adult patients in the COVID-19 era: an ongoing dilemma. *Lancet Rheumatol* 2020; published online Nov 10. [https://doi.org/10.1016/S2665-9913\(20\)30392-1](https://doi.org/10.1016/S2665-9913(20)30392-1).

| Study Reference                                                                 | <b>Study 1:</b> NCT02748785<br><sup>1</sup> Park et al., 2017;                                                                                  |                                                      |                                                                  |                                                     | <b>Study 2:</b> NCT02897011<br><sup>2</sup> Park et al., 2018                                                                            |                               |
|---------------------------------------------------------------------------------|-------------------------------------------------------------------------------------------------------------------------------------------------|------------------------------------------------------|------------------------------------------------------------------|-----------------------------------------------------|------------------------------------------------------------------------------------------------------------------------------------------|-------------------------------|
| MTX randomisation groups in relation to influenza vaccination                   | <b>MTX continue</b><br><br><b>Group 1</b>                                                                                                       | <b>MTX hold 4 weeks before</b><br><br><b>Group 2</b> | <b>MTX hold 2 weeks before &amp; after</b><br><br><b>Group 3</b> | <b>MTX hold 4 weeks after</b><br><br><b>Group 4</b> | <b>MTX continue</b>                                                                                                                      | <b>MTX hold 2 weeks after</b> |
| Study design                                                                    | Prospective randomised parallel-group single-centre study, patients with RA on stable dose of MTX were randomly assigned at a ratio of 1:1:1:1. |                                                      |                                                                  |                                                     | Prospective randomised parallel-group multicentre study, patients with RA on stable dose of MTX were randomly assigned at a ratio of 1:1 |                               |
| Influenza vaccine                                                               | Seasonal trivalent influenza vaccine, containing A (H1N1), A(H3N2) and B (Yamagata)                                                             |                                                      |                                                                  |                                                     | Seasonal quadrivalent influenza vaccine, containing four antigens: A(H1N1), (H3N2), B (Yamagata) and B (Victoria)                        |                               |
| Satisfactory vaccination response definition                                    | ≥4-fold increase in HI antibody titre at 4 weeks after vaccination, relative to the baseline, in ≥1 influenza vaccine antigens                  |                                                      |                                                                  |                                                     | ≥4-fold increase in HI antibody titre at 4 weeks after vaccination relative to the baseline, in ≥2 influenza vaccine antigens            |                               |
| RA flare definition                                                             | Increase in DAS28 of >1.2 (or >0.6 if the baseline DAS28 was ≥3.2)                                                                              |                                                      |                                                                  |                                                     |                                                                                                                                          |                               |
| n=                                                                              | 54                                                                                                                                              | 44                                                   | 49                                                               | 52                                                  | 156                                                                                                                                      | 160                           |
| % achieving satisfactory vaccine responses;<br>P value compared to MTX continue | 31.5<br>(N/A)                                                                                                                                   | 22.7<br>(p=0.334)                                    | *51.0<br>(p=0.044)                                               | 46.2<br>(p=0.121)                                   | 54.5<br>(N/A)                                                                                                                            | *75.5<br>(p<0.001)            |
| % RA flares at any time ≤20 weeks                                               | 24.1                                                                                                                                            | 34.1                                                 | 38.8                                                             | 21.2                                                | 5.1                                                                                                                                      | 10.6                          |

### Table Summary of evidence for interrupting methotrexate on antibody responses to influenza vaccination and RA flares

\*indicates statistical significance reached vs MTX continuation. MTX, methotrexate; RA, rheumatoid arthritis; HI, haemagglutination inhibition; DAS28, disease activity score (28); N/A Not applicable

#### References:

1. Park JK, Lee MA, Lee EY, et al. Effect of methotrexate discontinuation on efficacy of seasonal influenza vaccination in patients with rheumatoid arthritis: a randomised clinical trial. *Annals of the rheumatic diseases* 2017; **76**(9): 1559-65.
2. Park JK, Lee YJ, Shin K, et al. Impact of temporary methotrexate discontinuation for 2 weeks on immunogenicity of seasonal influenza vaccination in patients with rheumatoid arthritis: a randomised clinical trial. *Annals of the rheumatic diseases* 2018; **77**(6): 898-904.
